# Supplementary material
Source: PubMed Central journal article supplement (PMC8454510)

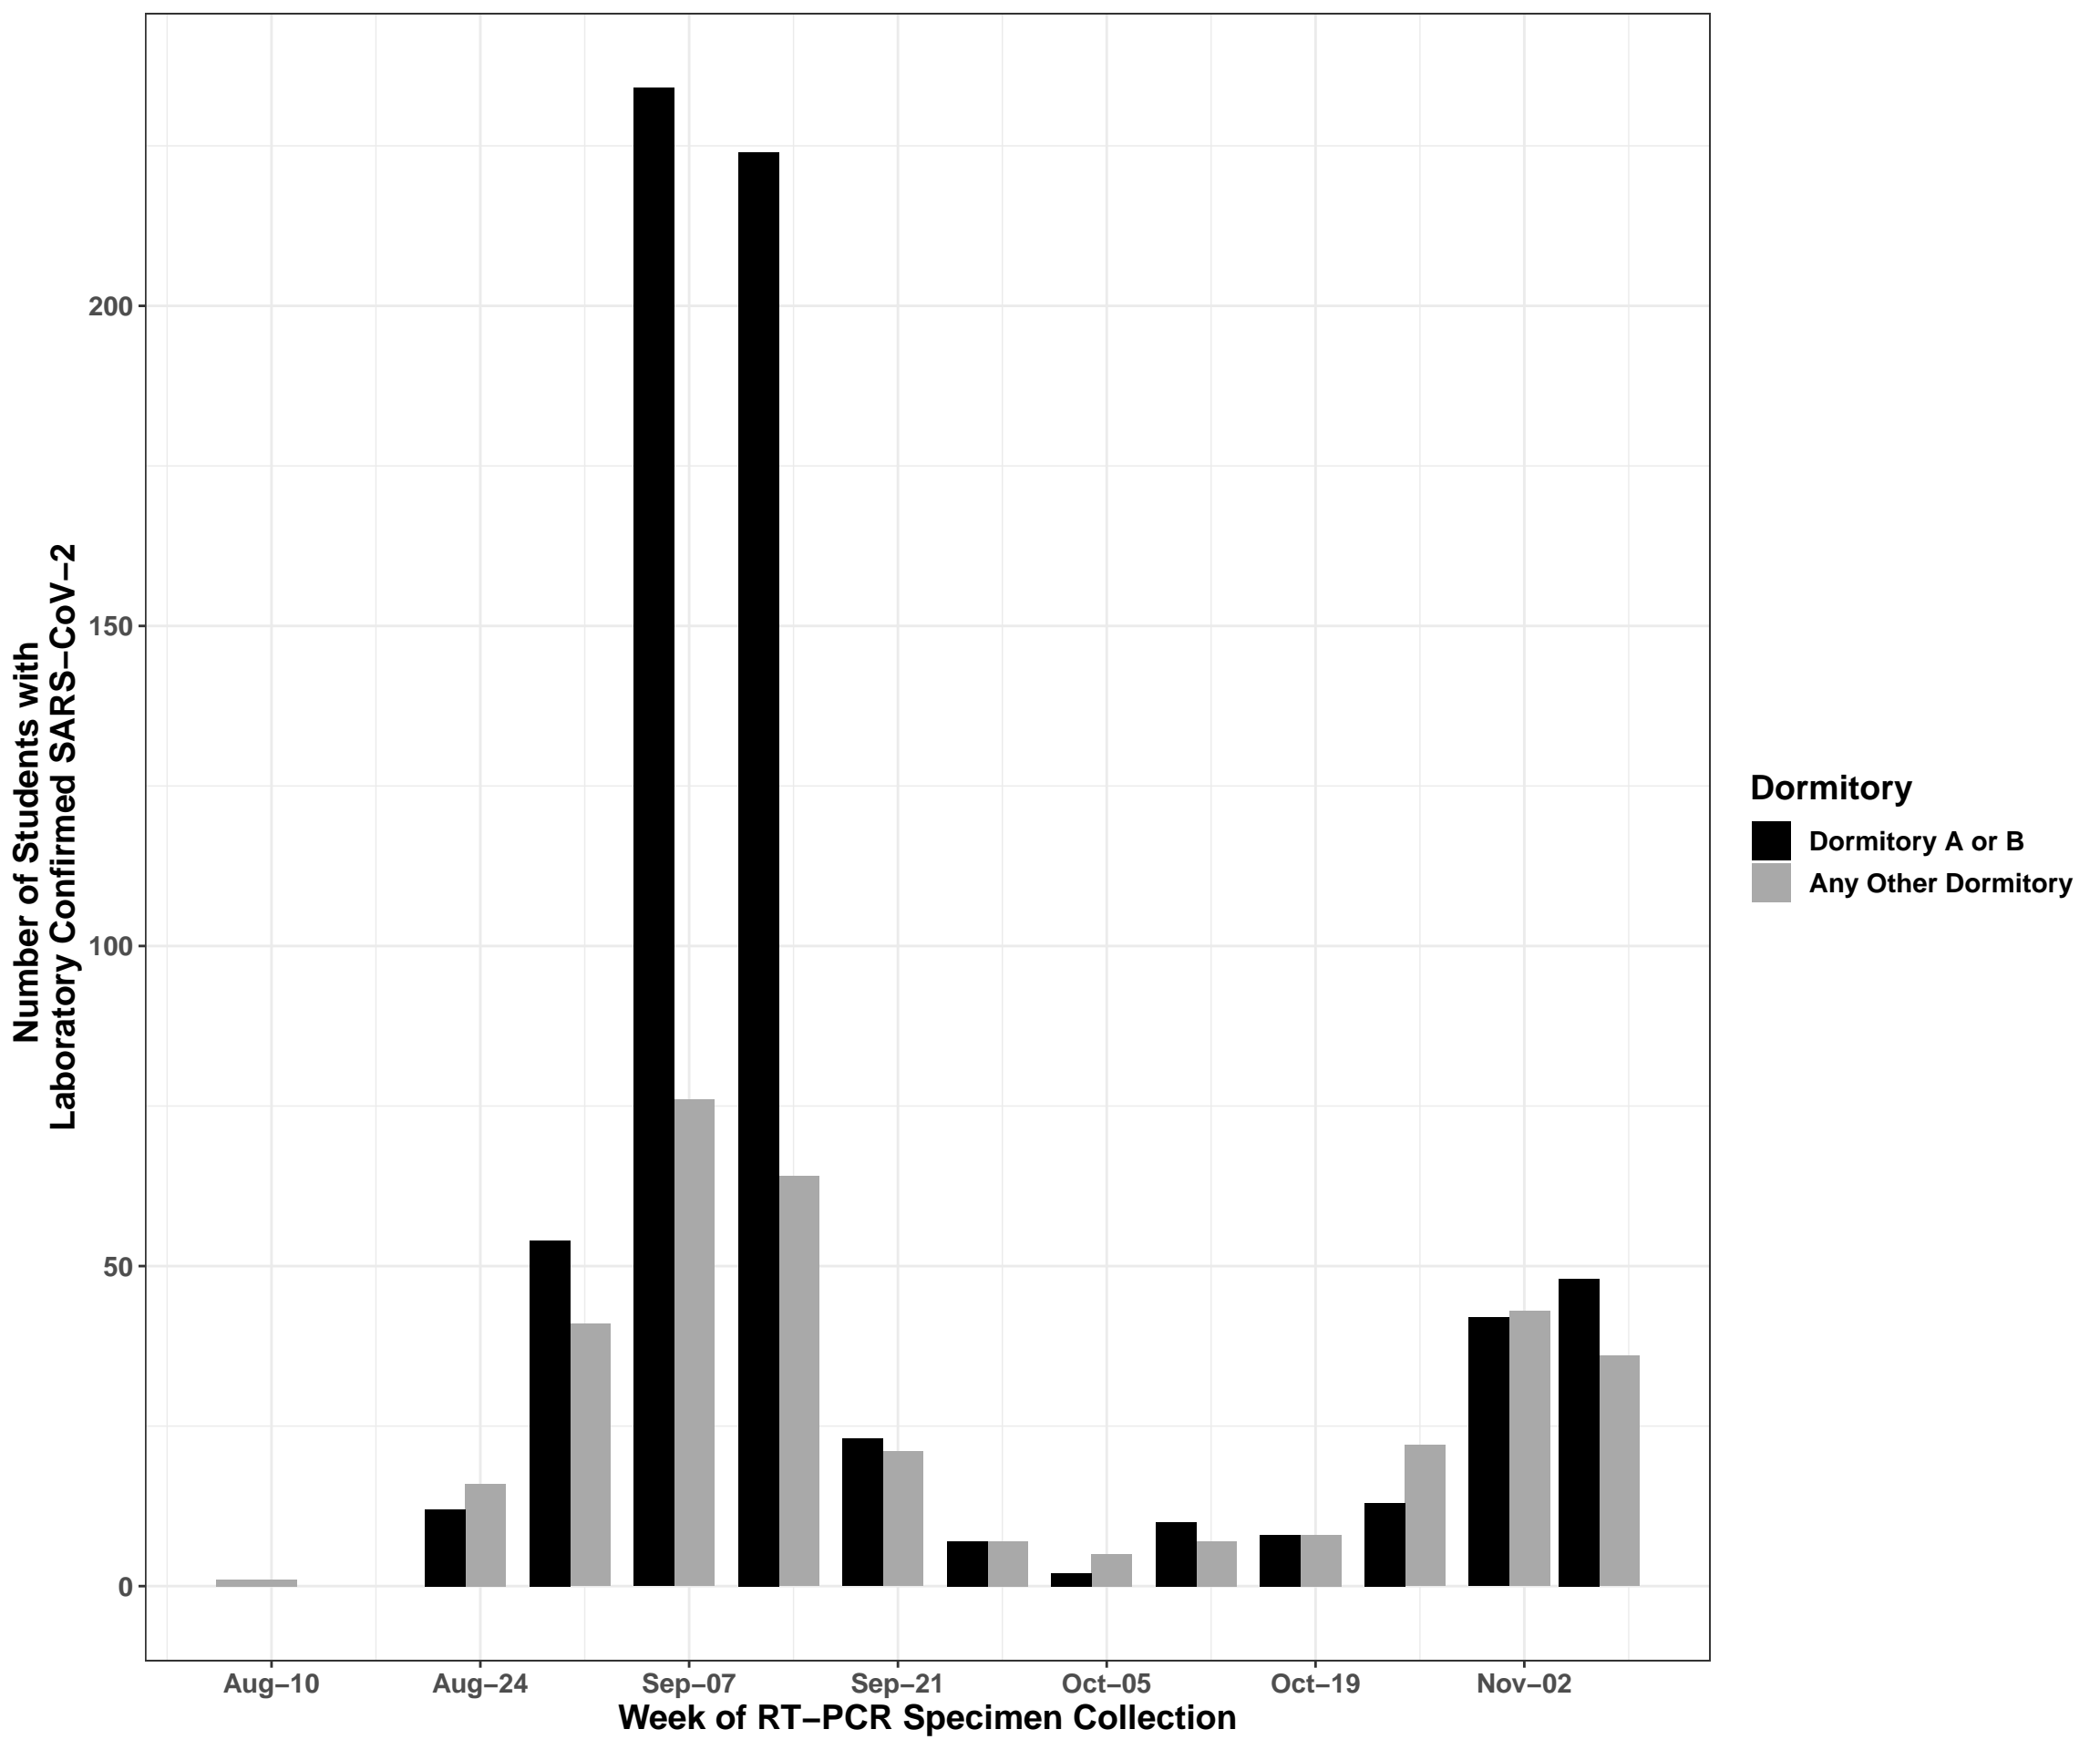

Supplement: ofab405_suppl_supplementary_figure_s1.pdf [file ofab405_suppl_supplementary_figure_s1.pdf]
